# Supplementary material for: Interaction of Polyphenylsilsesquioxane with Various β-Diketonate Complexes of Titanium by Mechanochemical Activation
Source: MDPI journal article supplement (doi:10.3390/powders2020027), 2023-06-08
Supplement: s1 [file s1]

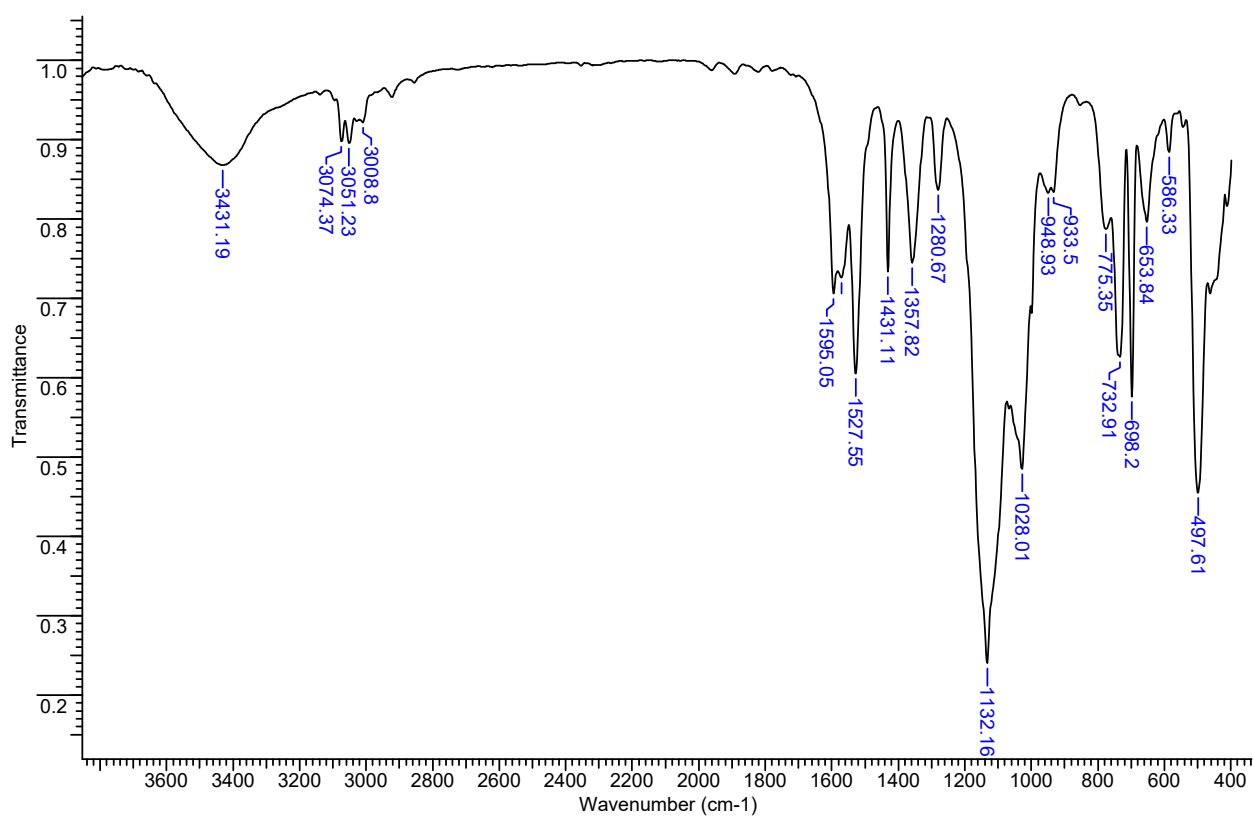

**Figure S1.** FT-IR spectra of fraction 1.1

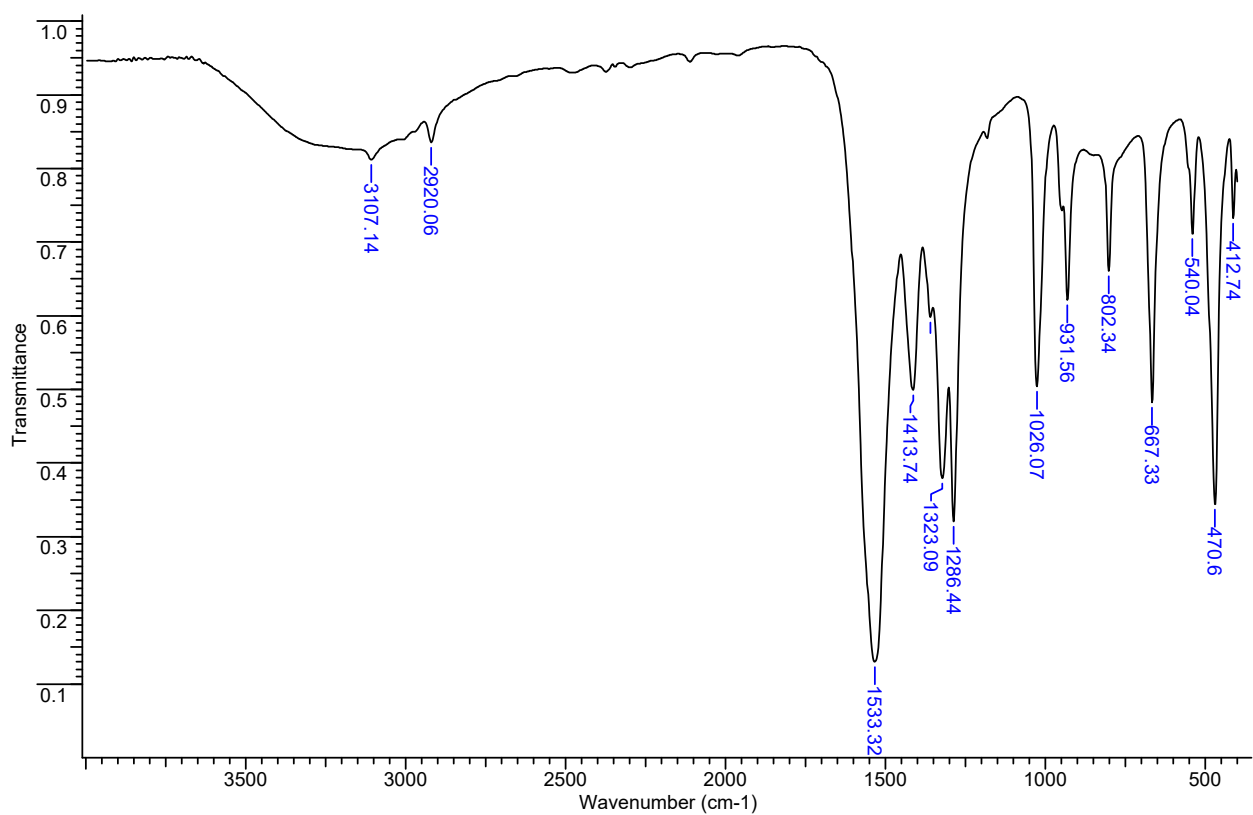

**Figure S2.** FT-IR spectra of initial complex 1

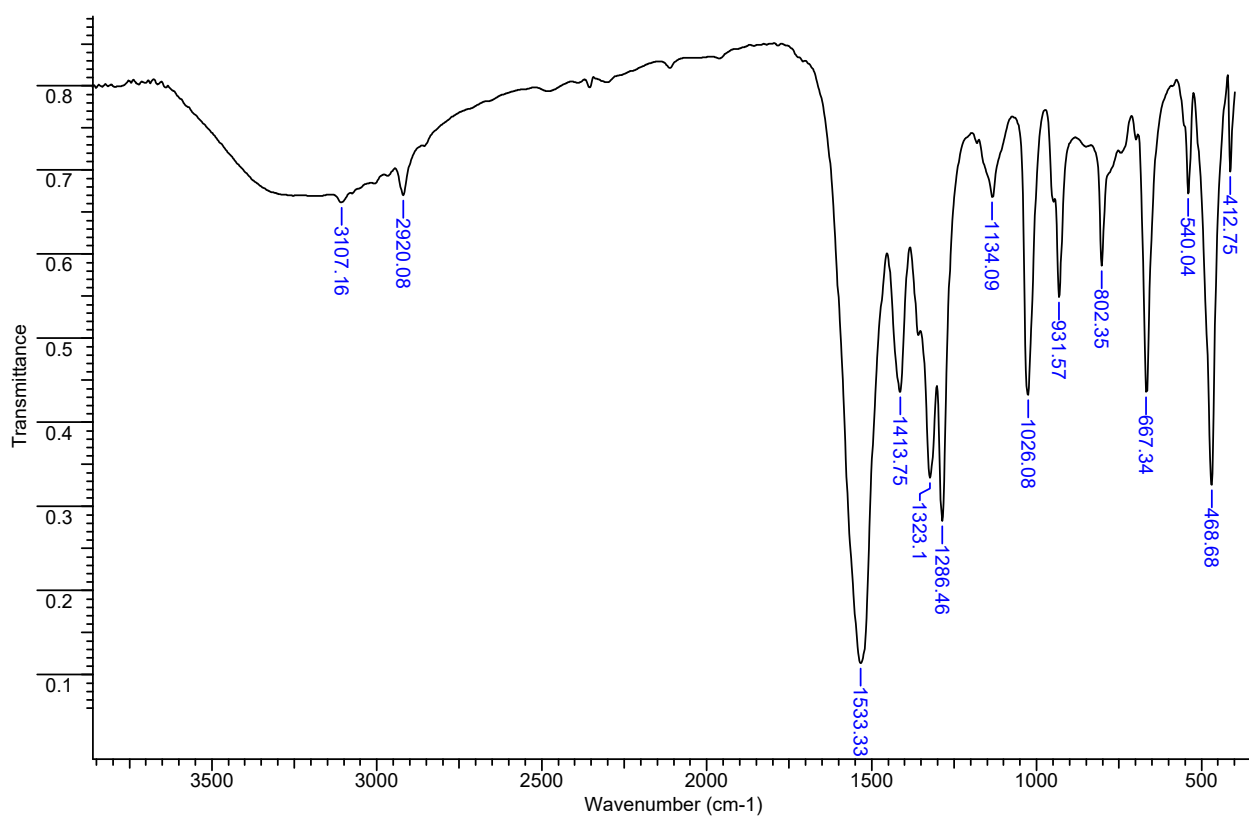

**Figure S3.** FT-IR spectra of insoluble fraction 1.2

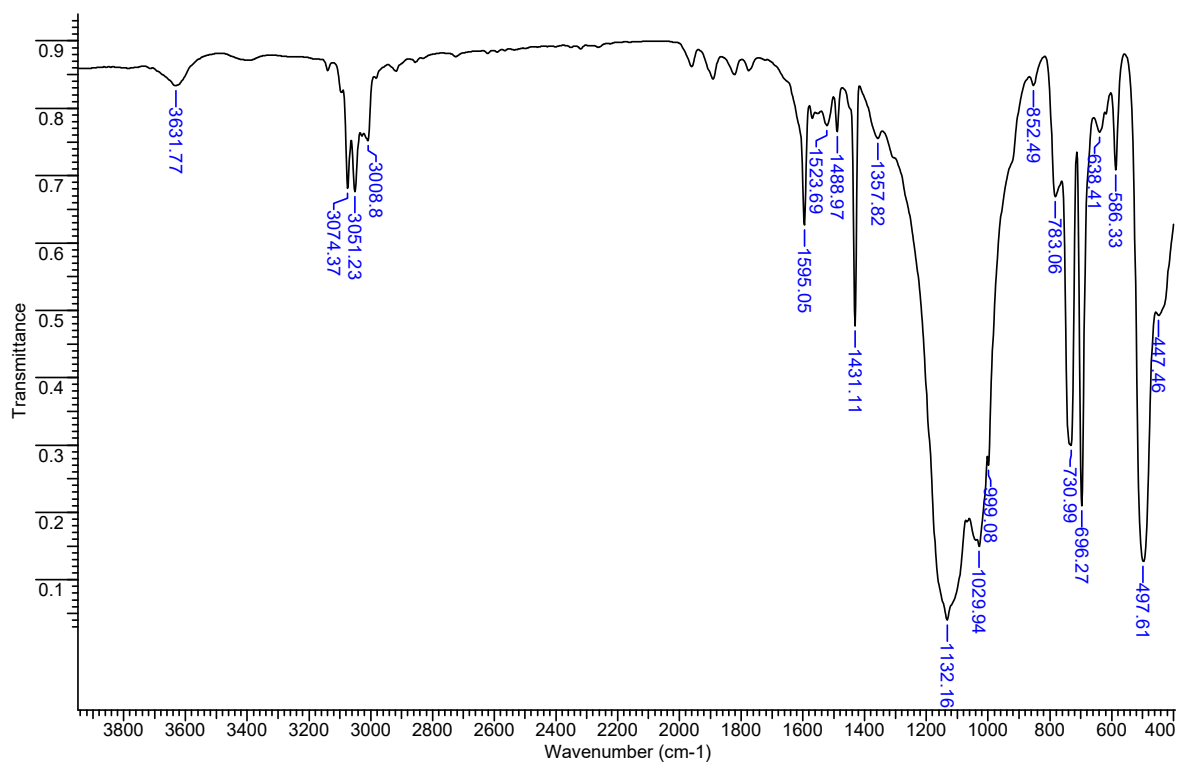

**Figure S4.** FT-IR spectra of insoluble fraction 2.1

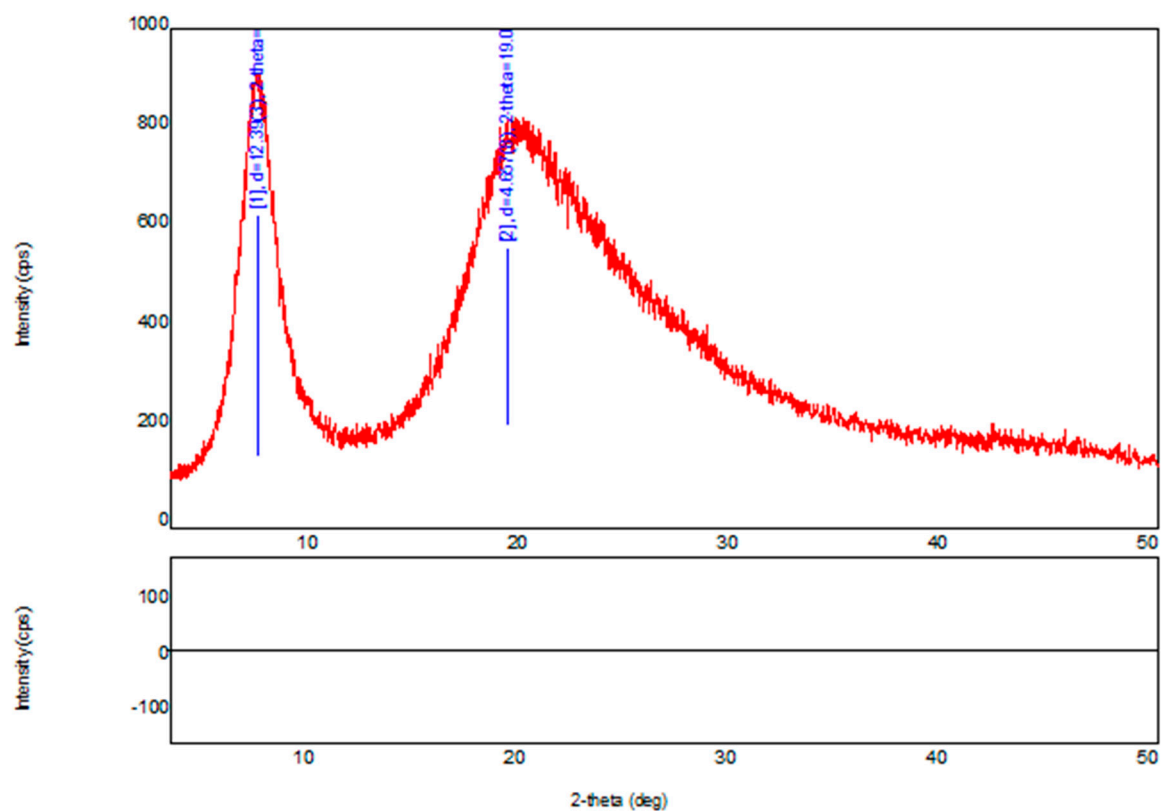

**Figure S5.** Diffraction pattern of fraction 2.1

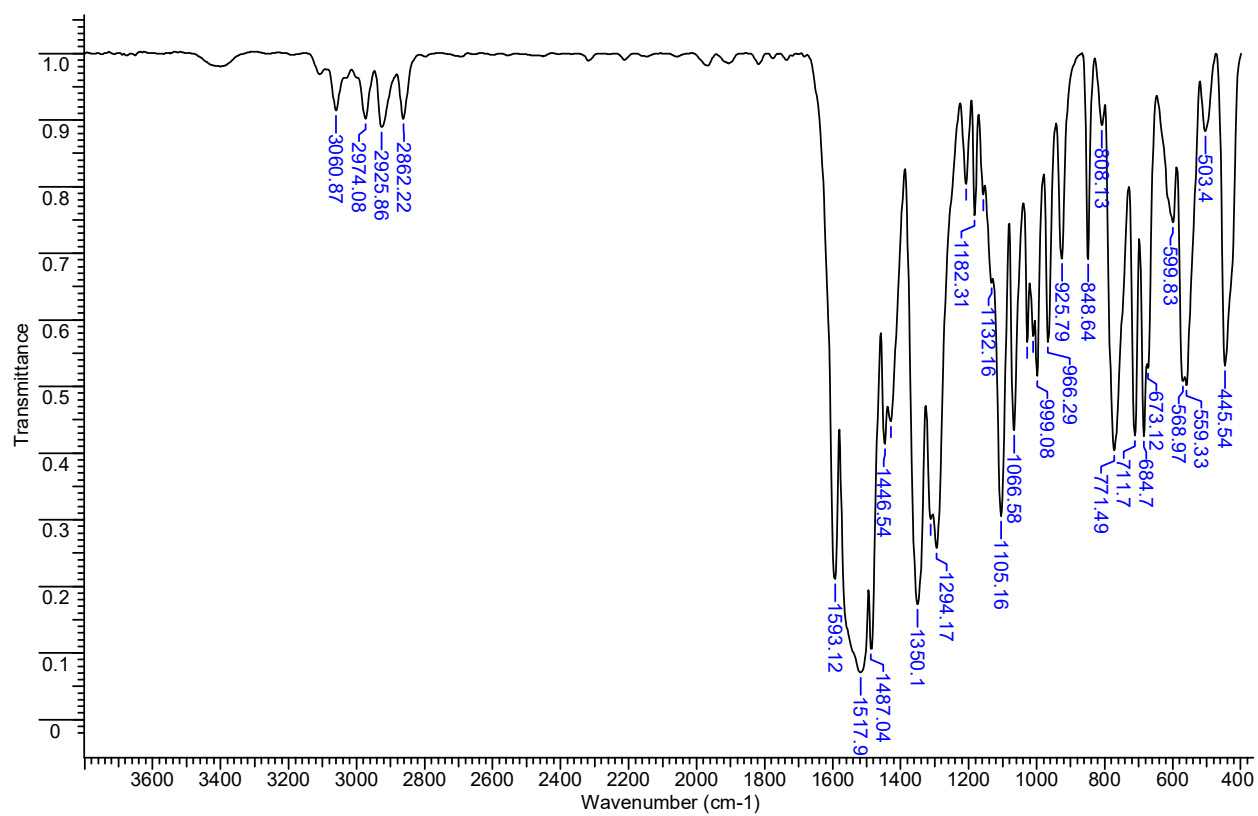

**Figure S6.** FT-IR spectra of fraction 2.2

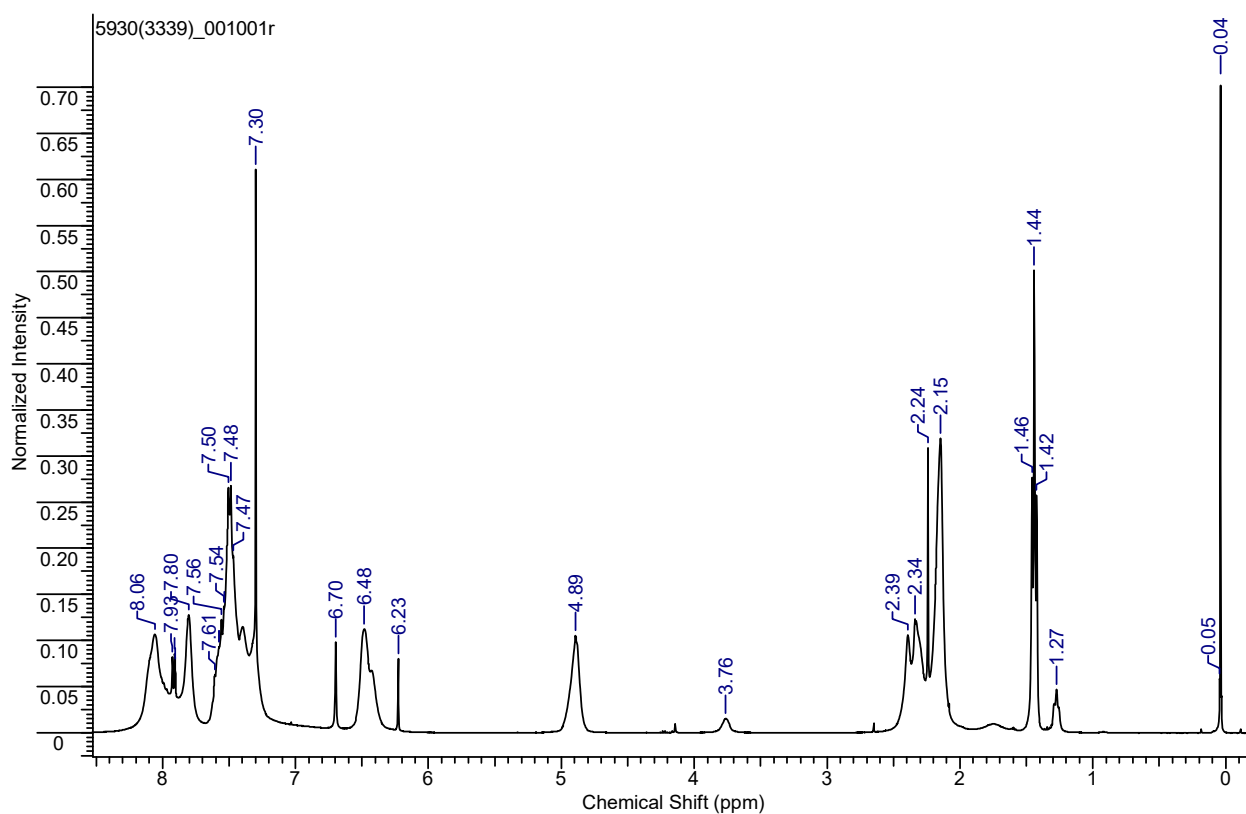

Figure S7.  $^1\text{H}$  NMR spectra of fraction 2.2

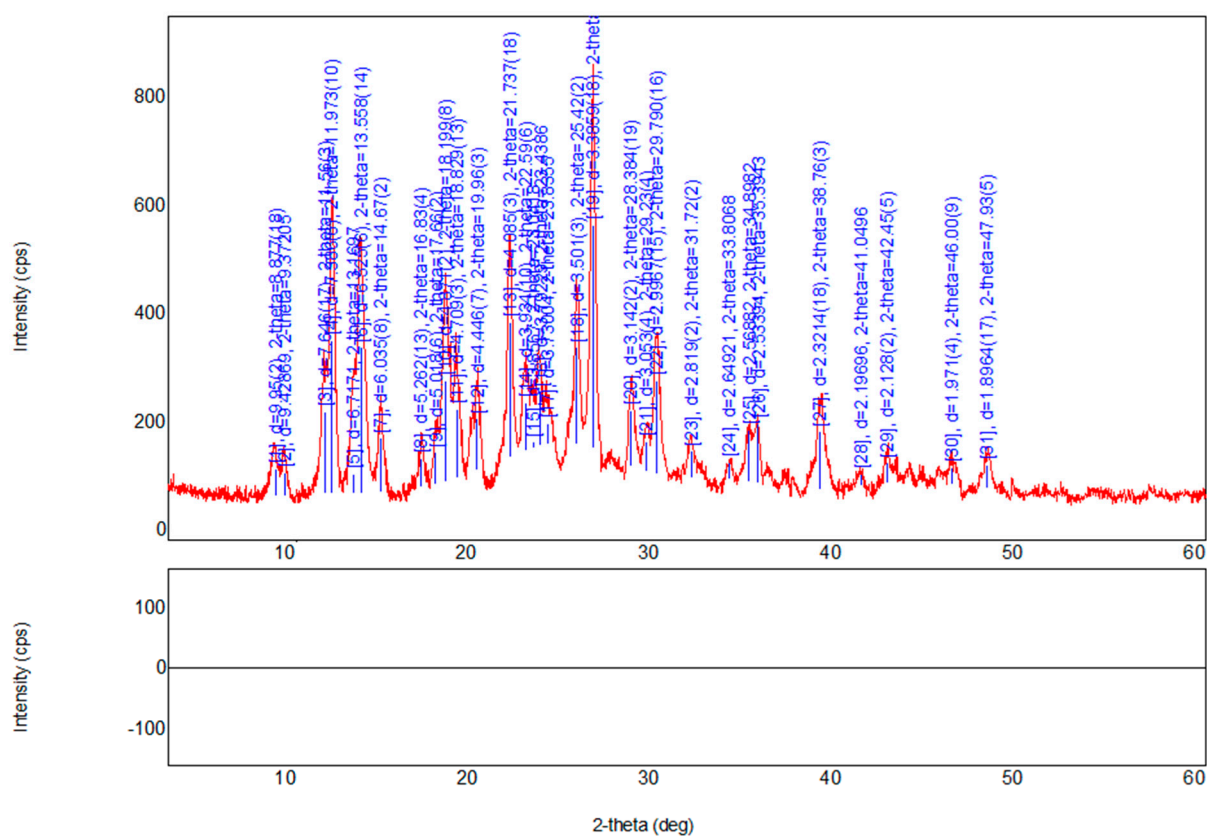

Figure S8. Diffraction pattern of fraction 2.3

**Table S1.** Data of X-ray phase analysis of fractions 2.3

| No. | 2-theta(deg) | d (Å)      | Height(cps) | Int. I(cps deg) | FWHM(deg) | Size    |
|-----|--------------|------------|-------------|-----------------|-----------|---------|
| 1   | 8.877(18)    | 9.95(2)    | 48(6)       | 45(3)           | 0.85(5)   | 98(6)   |
| 2   | 9.37205      | 9.42869    | 41.1751     | 19.7154         | 0.448763  | 185.51  |
| 3   | 11.56(3)     | 7.646(17)  | 149(11)     | 100(10)         | 0.62(7)   | 134(15) |
| 4   | 11.973(10)   | 7.386(6)   | 281(15)     | 91(11)          | 0.300(15) | 278(14) |
| 5   | 13.1697      | 6.7171     | 33.6237     | 16.1516         | 0.448763  | 186.117 |
| 6   | 13.558(14)   | 6.525(6)   | 267(15)     | 203(4)          | 0.697(14) | 120(2)  |
| 7   | 14.67(2)     | 6.035(8)   | 98(9)       | 41(2)           | 0.39(2)   | 215(12) |
| 8   | 16.83(4)     | 5.262(13)  | 51(7)       | 18(2)           | 0.32(4)   | 262(34) |
| 9   | 17.66(2)     | 5.018(6)   | 56(7)       | 27(27)          | 0.46(5)   | 184(20) |
| 10  | 18.199(8)    | 4.871(2)   | 184(12)     | 64(13)          | 0.327(17) | 257(13) |
| 11  | 18.829(13)   | 4.709(3)   | 125(10)     | 92(5)           | 0.69(4)   | 121(6)  |
| 12  | 19.96(3)     | 4.446(7)   | 93(9)       | 45(3)           | 0.45(3)   | 188(14) |
| 13  | 21.737(18)   | 4.085(3)   | 246(14)     | 83(3)           | 0.316(14) | 267(12) |
| 14  | 22.59(6)     | 3.934(10)  | 87(9)       | 101(5)          | 1.08(6)   | 78(5)   |
| 15  | 23.0418      | 3.8567     | 8.8975      | 3.77033         | 0.389152  | 217.595 |
| 16  | 23.4386      | 3.79229    | 97.868      | 41.5046         | 0.389152  | 217.75  |
| 17  | 23.8355      | 3.73004    | 36.2577     | 15.3888         | 0.389152  | 217.908 |
| 18  | 25.42(2)     | 3.501(3)   | 177(12)     | 65(3)           | 0.34(2)   | 248(16) |
| 19  | 26.299(14)   | 3.3859(18) | 412(19)     | 147(5)          | 0.336(11) | 254(8)  |
| 20  | 28.384(19)   | 3.142(2)   | 101(9)      | 37.6(16)        | 0.335(18) | 255(14) |
| 21  | 29.23(4)     | 3.053(4)   | 54(7)       | 22(4)           | 0.37(7)   | 235(44) |
| 22  | 29.790(16)   | 2.9967(15) | 172(12)     | 71(4)           | 0.38(2)   | 228(12) |
| 23  | 31.72(2)     | 2.819(2)   | 47(6)       | 19(2)           | 0.31(3)   | 278(31) |
| 24  | 33.8068      | 2.64921    | 27.7558     | 12.0753         | 0.389152  | 222.839 |
| 25  | 34.8982      | 2.56882    | 92.6817     | 40.4522         | 0.389152  | 223.496 |
| 26  | 35.3943      | 2.53394    | 107.868     | 47.1514         | 0.389152  | 223.802 |
| 27  | 38.76(3)     | 2.3214(18) | 104(9)      | 67(3)           | 0.55(3)   | 161(8)  |
| 28  | 41.0496      | 2.19696    | 18.4261     | 8.206           | 0.389152  | 227.663 |
| 29  | 42.45(5)     | 2.128(2)   | 35(5)       | 23(3)           | 0.40(7)   | 221(36) |
| 30  | 46.00(9)     | 1.971(4)   | 29(5)       | 18(2)           | 0.43(10)  | 211(48) |
| 31  | 47.93(5)     | 1.8964(17) | 42(6)       | 21(2)           | 0.46(4)   | 196(15) |

| Ref.Code    | Score | Compound Name                                   | Scale Fac. | Chem. Formula                                                     |
|-------------|-------|-------------------------------------------------|------------|-------------------------------------------------------------------|
| 00-021-1932 | 73    | Titanium dichloro bis(1-phenyl-1,3-butanedione) | 0.406      | C <sub>20</sub> H <sub>18</sub> Cl <sub>2</sub> O <sub>4</sub> Ti |
| 01-083-1949 | 40    | Silicon Oxide                                   | 0.192      | SiO <sub>2</sub>                                                  |



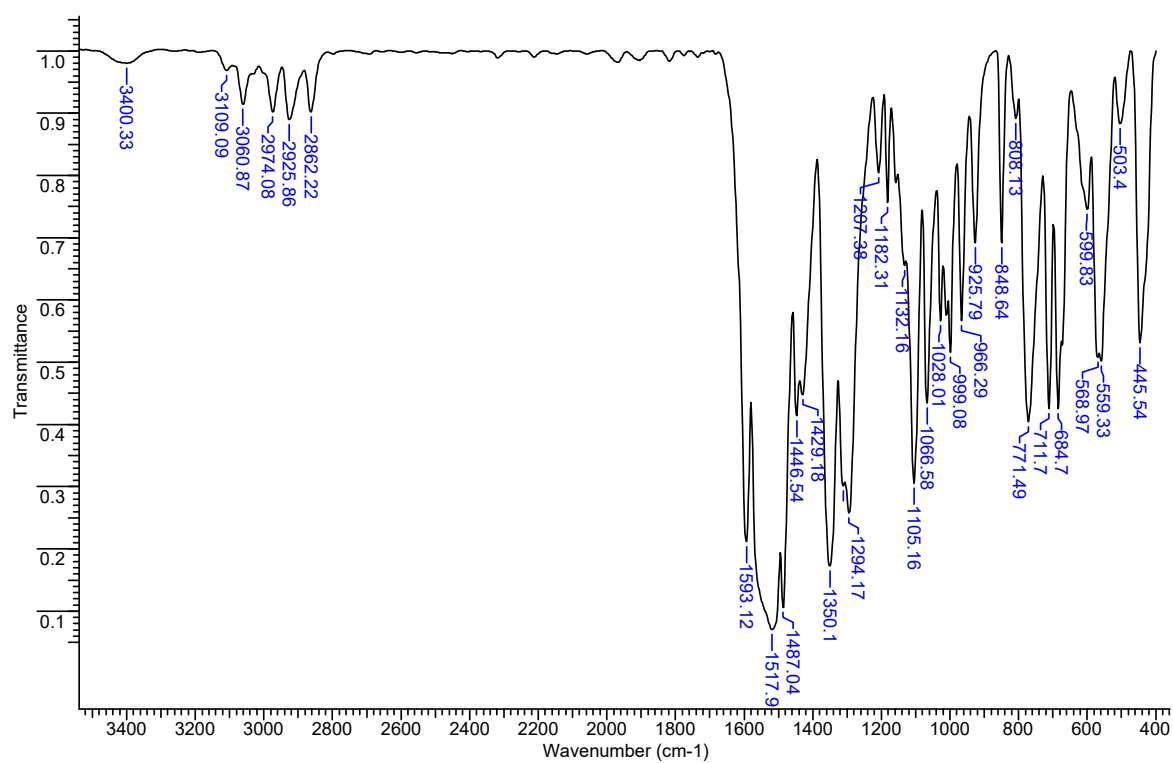

Figure S11. FT-IR spectra of fraction 3.2

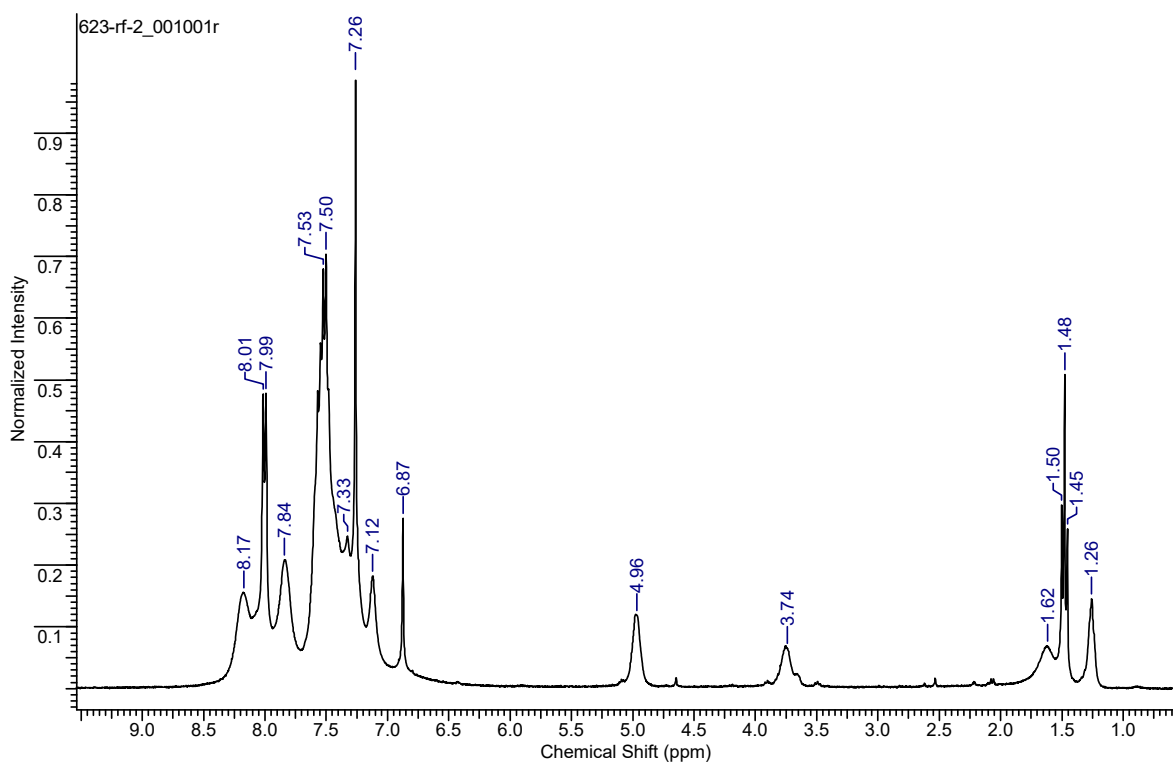

Figure S12. <sup>1</sup>H NMR spectra of fraction 3.2

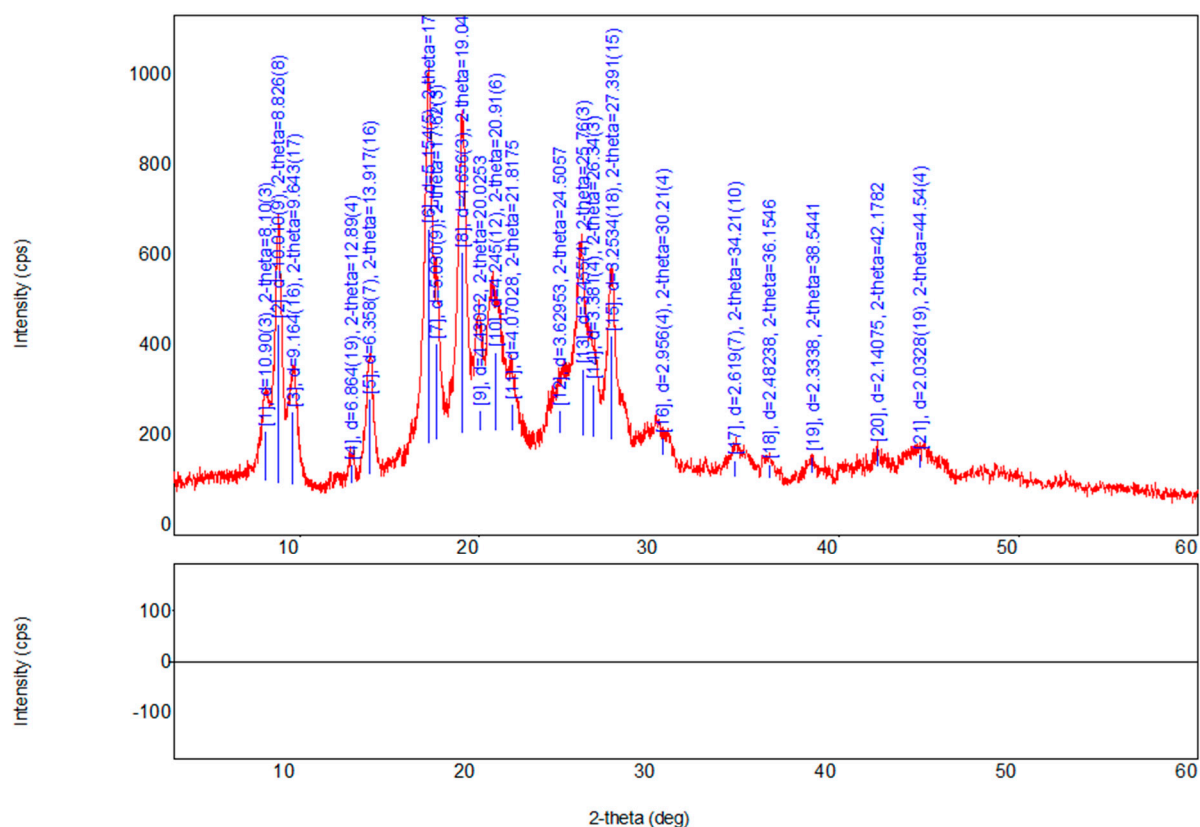

**Figure S13.** Diffraction pattern of fraction 3.3

**Table S2.** Data of X-ray phase analysis of fractions 3.3

| No.         | 2-theta(deg) | d (Å)                                             | Height(cps) | Int. I(cps deg) | FWHM(deg)  | Size                                                              |
|-------------|--------------|---------------------------------------------------|-------------|-----------------|------------|-------------------------------------------------------------------|
| 1           | 8.10(3)      | 10.90(3)                                          | 107(9)      | 77(7)           | 0.57(5)    | 145(12)                                                           |
| 2           | 8.826(8)     | 10.010(9)                                         | 351(17)     | 181(7)          | 0.407(13)  | 204(7)                                                            |
| 3           | 9.643(17)    | 9.164(16)                                         | 161(12)     | 134(5)          | 0.65(3)    | 127(5)                                                            |
| 4           | 12.89(4)     | 6.864(19)                                         | 38(6)       | 13.2(14)        | 0.31(4)    | 272(33)                                                           |
| 5           | 13.917(16)   | 6.358(7)                                          | 165(12)     | 88(3)           | 0.468(14)  | 179(5)                                                            |
| 6           | 17.191(17)   | 5.154(5)                                          | 474(20)     | 242(42)         | 0.43(3)    | 197(14)                                                           |
| 7           | 17.62(3)     | 5.030(9)                                          | 211(13)     | 128(40)         | 0.51(15)   | 165(49)                                                           |
| 8           | 19.047(14)   | 4.656(3)                                          | 399(18)     | 200(6)          | 0.443(12)  | 190(5)                                                            |
| 9           | 20.0253      | 4.43032                                           | 42.54       | 28.6293         | 0.57384    | 146.827                                                           |
| 10          | 20.91(6)     | 4.245(12)                                         | 172(12)     | 465(11)         | 2.27(8)    | 37.2(13)                                                          |
| 11          | 21.8175      | 4.07028                                           | 55.5505     | 37.4265         | 0.57384    | 147.251                                                           |
| 12          | 24.5057      | 3.62953                                           | 47.3043     | 31.9294         | 0.57384    | 147.961                                                           |
| 13          | 25.76(3)     | 3.455(4)                                          | 145(11)     | 136(41)         | 0.75(4)    | 114(6)                                                            |
| 14          | 26.34(3)     | 3.381(4)                                          | 114(10)     | 257(8)          | 1.79(8)    | 48(2)                                                             |
| 15          | 27.391(15)   | 3.2534(18)                                        | 229(14)     | 141(5)          | 0.427(19)  | 200(9)                                                            |
| 16          | 30.21(4)     | 2.956(4)                                          | 36(5)       | 40(4)           | 0.90(11)   | 95(11)                                                            |
| 17          | 34.21(10)    | 2.619(7)                                          | 35(5)       | 70(5)           | 1.88(10)   | 46(2)                                                             |
| 18          | 36.1546      | 2.48238                                           | 27.907      | 25.3372         | 0.746503   | 116.918                                                           |
| 19          | 38.5441      | 2.3338                                            | 34.3265     | 31.212          | 0.746503   | 117.745                                                           |
| 20          | 42.1782      | 2.14075                                           | 40.4357     | 36.8586         | 0.746503   | 119.126                                                           |
| 21          | 44.54(4)     | 2.0328(19)                                        | 28(5)       | 51(5)           | 1.48(13)   | 61(5)                                                             |
| Ref.Code    | Score        | Compound Name                                     |             |                 | Scale Fac. | Chem. Formula                                                     |
| 00-038-0197 | 64           | Silicon Oxide                                     |             |                 | 0.277      | SiO <sub>2</sub>                                                  |
| 00-021-1931 | 49           | Titanium dichloro (1,3-diphenyl-1,3-propanedione) |             |                 | 0.271      | C <sub>30</sub> H <sub>22</sub> Cl <sub>2</sub> O <sub>4</sub> Ti |
